# Supplementary material for: Hierarchical anatase TiO2 porous nanopillars with high crystallinity and controlled length: an effective candidate for dye-sensitized solar-cells
Source: Royal Society of Chemistry journal article supplement (doi:10.1039/b922658c), 2010-01-01
Supplement: b922658c.pdf [file b922658c.pdf]

## Electronic Supplementary Information

### Hierarchical anatase TiO<sub>2</sub> porous nanopillars with high crystallinity and controlled length: An effective candidate for dye-sensitized solar-cells

*Yang Qu, Wei Zhou, Kai Pan, Chungui Tian, Zhiyu Ren, Youzhen Dong, and*

*Honggang Fu\**

Key Laboratory of Functional Inorganic Material Chemistry, Ministry of Education of the People's Republic of China, Heilongjiang University, Harbin 150080 P. R. China

Corresponding author E-mail: [fuhg@vip.sina.com](mailto:fuhg@vip.sina.com), Tel.: +86 451 8660 8458, Fax: +86 451 8667 3647

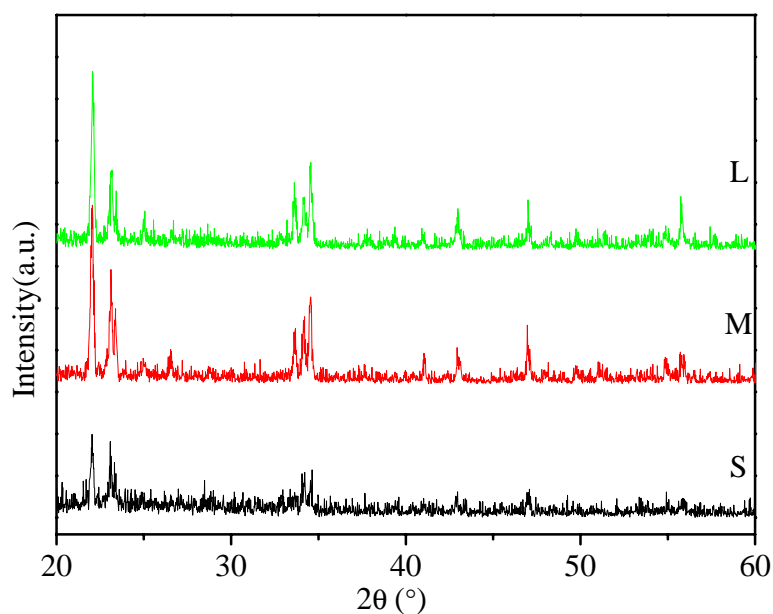

Figure S1. Typical XRD patterns of the precursors with different lengths.

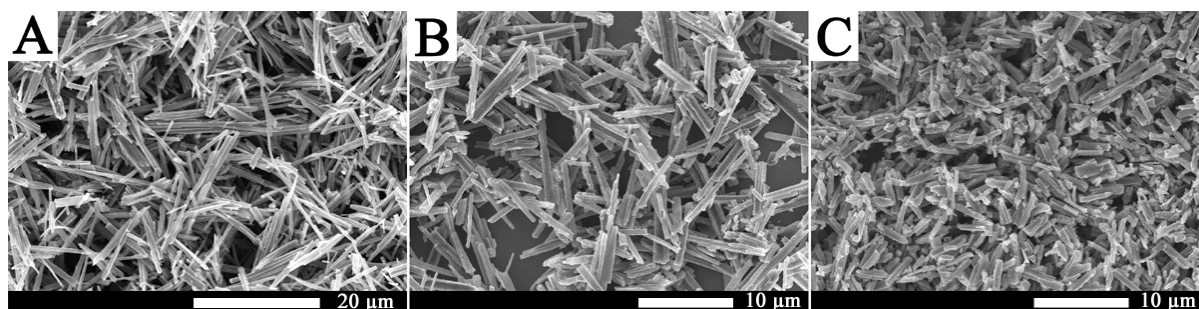

Figure S2. The SEM images of L-700 (A), M-700 (B) and S-700 (C), respectively.

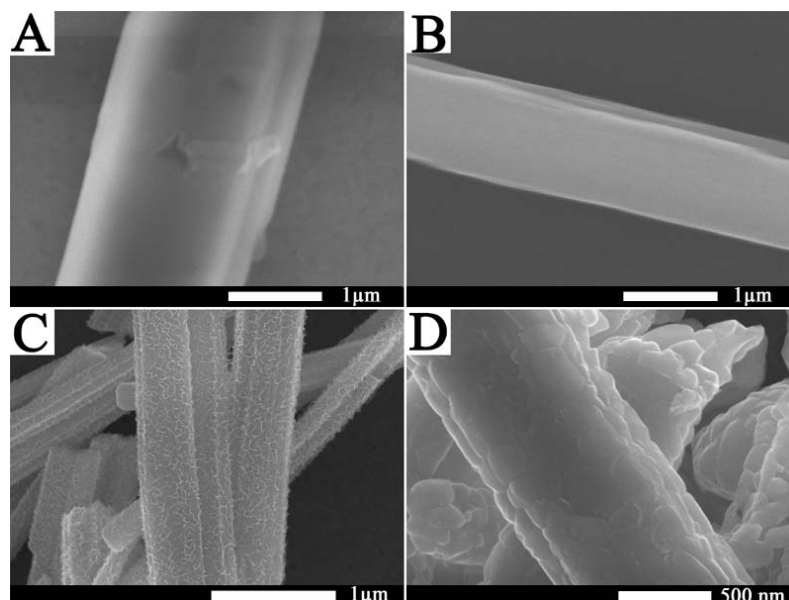

Figure S3. Magnified SEM images of the long precursor (A) and L-450 (B), L-EN-700 (C) and L-700 (D), respectively.

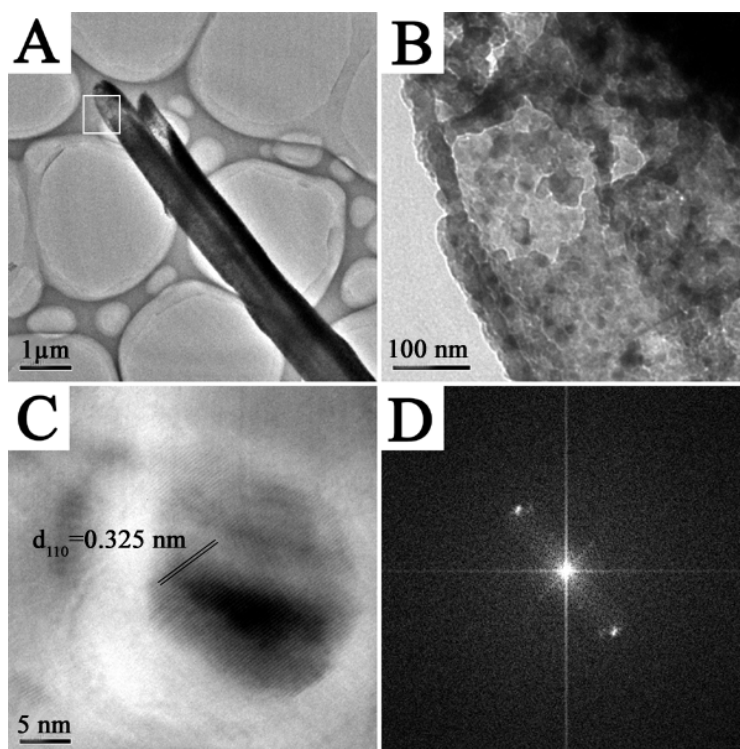

Figure S4. Typical TEM micrographs at three different magnifications of L-700 (A, B, C) and its corresponding Fourier transforms (D). (A) is the TEM micrograph of L-700 which exhibits pillar-like structure. (B) is the magnification of the defined area of (A). (C) is the HRTEM micrograph of L-700 which clearly exhibits (110) faces (Rutile:  $d_{110}=0.325 \text{ nm}$ ).

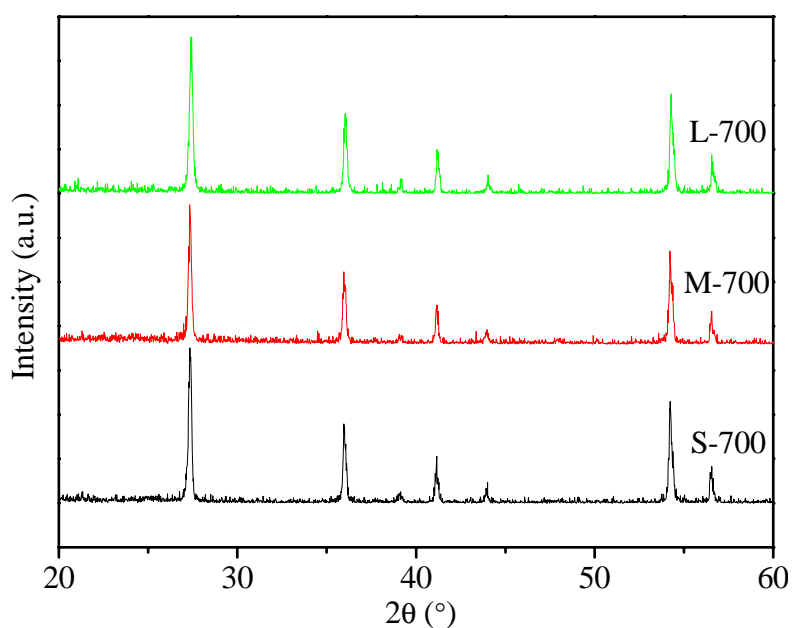

Figure S5. The typical XRD patterns of L-700, M-700 and S-700, respectively.

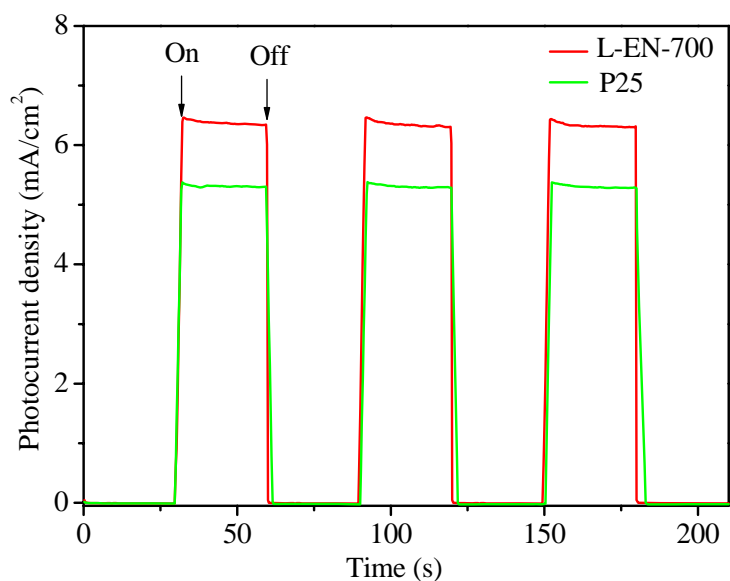

Figure S6. Photocurrent response vs time profiles of the cells composed of P25 (two layer P25 nanoparticles) and L-EN-700 (sandwich structure photoanode with two layer P25 nanoparticles and the middle layer of L-EN-700), respectively.

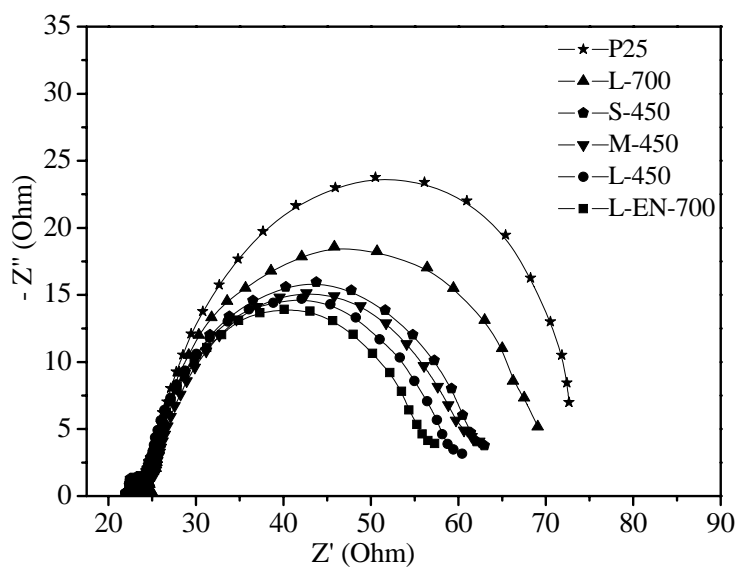

Figure S7. Nyquist plots of cells composed of P25 nanoparticles and the sandwich structure photoanodes with L-EN-700, L-450, M-450, S-450 and L-700, respectively, under the light intensity of 100 mW cm<sup>-2</sup>.

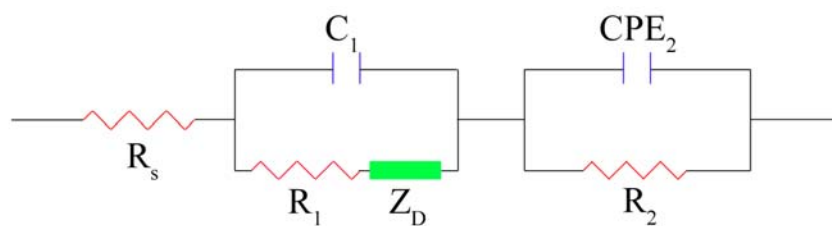

Figure S8. Equivalent circuit used to represent interfaces in composite solar cells composed of FTO | TiO<sub>2</sub>-dye | I<sub>3</sub><sup>-</sup>/I<sup>-</sup> || Pt | FTO. The symbols of R and C represented a resistance and a capacitance, respectively, O represented finite-length Warburg diffusion ( $Z_D$ ) and CPE is the symbol for the constant phase element.
